# Supplementary material
Source: HighWire-hosted journal article supplement (http://rc.rcjournal.com/highwire/filestream/28354/field_highwire_adjunct_files/0/Supplement_Resp_Care.pdf)

## **Quantitative CT scan and response to pronation in COVID-19 ARDS**

Francesco Zadek, MD<sup>1</sup>, Luca Berta, PhD<sup>2</sup>, Giulia Zorzi, MSc<sup>2,3</sup>, Stefania Ubiali, MD<sup>4</sup>, Amos Bonaiuti, MD<sup>1</sup>, Giulia Tundo, MD<sup>1</sup>, Beatrice Brunoni, MD<sup>1</sup>, Francesco Marrazzo, MD<sup>5</sup>, Riccardo Giudici, MD<sup>5</sup>, Anna Rossi, MD<sup>5</sup>, Francesco Rizzetto, MD<sup>6</sup>, Davide Bernasconi, PhD<sup>7</sup>, Angelo Vanzulli, MD<sup>6,8</sup>, Paola Enrica Colombo, PhD<sup>2</sup>, Roberto Fumagalli, MD<sup>1,5</sup>, Alberto Torresin, PhD<sup>2</sup>, Thomas Langer, MD<sup>1,5</sup>.

<sup>1</sup>Department of Medicine and Surgery, University of Milan-Bicocca, Monza, Italy

<sup>2</sup>Department of Medical Physics, ASST Grande Ospedale Metropolitano Niguarda, Milan, Italy

<sup>3</sup>Department of Physics, INFN Milan Unit, Milan, Italy

<sup>4</sup>Department of Pathophysiology and Transplantation, University of Milan, Milan, Italy

<sup>5</sup>Department of Anesthesia and Intensive Care Medicine, Niguarda Ca' Granda, Milan, Italy.

<sup>6</sup>Department of Radiology, ASST Grande Ospedale Metropolitano Niguarda, Milan, Italy.

<sup>7</sup>School of Medicine and Surgery, Bicocca Bioinformatics Biostatistics and Bioimaging Center - B4, University of Milano-Bicocca, Monza, Italy

<sup>8</sup>Department of Oncology and Hemato-Oncology, Università degli Studi di Milano, Milan, Italy.

### **Corresponding**

Thomas Langer, MD; Department of Medicine and Surgery, University of Milan-Bicocca, Monza, Italy; Department of Anesthesia and Intensive Care Medicine, Niguarda Ca' Granda, Milan, Italy, Italy. tel. +39 02 64448580; email: [Thomas.Langer@unimib.it](mailto:Thomas.Langer@unimib.it)

**Online supplementary materials**

## Supplementary methods

The CT scan measures the density ( $\rho_{\text{Lung}}$ ). The lung is assumed to comprise two compartments: tissue,  $\rho=1$ , Hounsfield units, HU =0, and gas,  $\rho=0$ , HU = -1000. According to these premises, it is possible to calculate, in each voxel, both density and mass (density =  $\rho$ ):

$$\rho = \frac{CT + 1000}{1000}$$

$$\text{Voxel tissue mass} = \rho_{\text{voxel}} \cdot V_{\text{voxel}}$$

The total lung volume ( $V_{\text{lung}}$ ) was computed as

$$V_{\text{lung}} = V_{\text{voxel}} * \text{No of Voxels}$$

where  $V_{\text{voxel}}$  equals the volume of a single voxel.

The total tissue mass of the lung was computed as the product of the density multiplied by lung volume:

$$\text{Lung tissue mass} = \rho \cdot V_{\text{lung}}$$

While the gas volume was computed as

$$\text{Total gas volume} = (1 - \rho) * \text{Total lung volume}$$

## Supplementary Tables

**Table S1. Population demographic characteristics at ICU admission divided by the oxygen response to pronation**

| Variables                                                           | Total<br>(N = 125) | Oxygen Non-<br>responders<br>(N = 62) | Oxygen<br>Responders<br>(N = 63) | p-value |
|---------------------------------------------------------------------|--------------------|---------------------------------------|----------------------------------|---------|
| <b>Sex, Female n (%)</b>                                            | 30 (24)            | 14 (23)                               | 16 (25)                          | .44     |
| <b>Age, years</b>                                                   | 62 ± 11            | 62 ± 10                               | 61 ± 11                          | .50     |
| <b>Weight, kg</b>                                                   | 86 ± 19            | 85 ± 19                               | 87 ± 19                          | .63     |
| <b>Height, cm</b>                                                   | 171 ± 9            | 171 ± 8                               | 170 ± 9                          | .38     |
| <b>BMI, kg/m<sup>2</sup></b>                                        | 30 ± 6             | 29 ± 7                                | 30 ± 6                           | .40     |
| <b>Comorbidities:</b>                                               |                    |                                       |                                  |         |
| <b>Hypertension, n (%)</b>                                          | 64 (51)            | 32 (52)                               | 32 (51)                          | .93     |
| <b>Diabetes, n (%)</b>                                              | 22 (18)            | 11 (18)                               | 11 (17)                          | .97     |
| <b>Active Smoke, n (%)</b>                                          | 5 (4)              | 3 (5)                                 | 2 (3)                            | .68     |
| <b>Obesity, n (%)</b>                                               | 38 (30)            | 16 (26)                               | 22 (35)                          | .27     |
| <b>Cancer, n (%)</b>                                                | 14 (11)            | 11 (18)                               | 3 (5)                            | .025    |
| <b>CKD, n (%)</b>                                                   | 9 (7)              | 6 (10)                                | 3 (5)                            | .32     |
| <b>COPD, n (%)</b>                                                  | 13 (10)            | 6 (10)                                | 7 (11)                           | .79     |
| <b>Atrial Fibrillation, n (%)</b>                                   | 8 (6)              | 6 (10)                                | 2 (3)                            | .16     |
| <b>CAD, n (%)</b>                                                   | 15 (12)            | 9 (15)                                | 6 (10)                           | .39     |
| <b>Liver disease, n (%)</b>                                         | 10 (8)             | 2 (3)                                 | 8 (13)                           | .10     |
| <b>SOFA</b>                                                         | 5 [4, 6]           | 5 [4, 6]                              | 5 [3, 7]                         | .77     |
| <b>SAPS II</b>                                                      | 38 [33, 43]        | 40 [34, 45]                           | 37 [33, 43]                      | .34     |
| <b>Days between the onset of symptoms and CT scan, days</b>         | 10±6               | 12 ± 7                                | 9 ± 5                            | .009    |
| <b>Days between the onset of symptoms and first pronation, days</b> | 11±6               | 12±7                                  | 9±4                              | .004    |

The median PaO<sub>2</sub>/FiO<sub>2</sub> ratio increase observed during prone ventilation was used as cut-off, defining Oxygen Responders subjects with a PaO<sub>2</sub>/FiO<sub>2</sub> ratio above the median value and Oxygen Non Responders when below. *Acronyms: BMI body mass index; CAD coronary arterial disease; CKD: chronic kidney disease; COPD: chronic obstructive pulmonary disease; CT computed tomography; ICU: intensive care unit; SAPS: Simplified Acute Physiology Score; SOFA: Sequential Organ Failure Assessment.*

**Table S2. Ventilatory parameters of the population divided by oxygen response to pronation in supine position before the first pronation**

| <b>Variables</b>                                | <b>Total<br/>(N = 125)</b> | <b>Oxygen Non-<br/>responders<br/>(N = 62)</b> | <b>Oxygen<br/>Responders<br/>(N = 63)</b> | <b>p-value</b> |
|-------------------------------------------------|----------------------------|------------------------------------------------|-------------------------------------------|----------------|
| <b>ARDS Severity</b>                            |                            |                                                |                                           | .60            |
| Mild n (%)                                      | 1 (0.8)                    | 0 (0.0)                                        | 1 (2)                                     |                |
| Moderate n (%)                                  | 65 (52.0)                  | 33 (53)                                        | 32 (51)                                   |                |
| Severe n (%)                                    | 59 (47.2)                  | 29 (47)                                        | 30 (47)                                   |                |
| <b>Ventilator setting:</b>                      |                            |                                                |                                           |                |
| <b>Tidal Volume/PBW,</b><br>ml/kg               | 6.7 ± 0.9                  | 6.6 ± 1.0                                      | 6.8 ± 0.8                                 | .31            |
| <b>RR,</b> breath/minute                        | 19 ± 3                     | 19 ± 4                                         | 19 ± 3                                    | .84            |
| <b>PEEP,</b> cm H <sub>2</sub> O                | 12 ± 2                     | 12 ± 2                                         | 12 ± 2                                    | .85            |
| <b>Plateau Pressure,</b> cm<br>H <sub>2</sub> O | 24 ± 3                     | 24 ± 3                                         | 23 ± 3                                    | .44            |
| <b>Crs,</b> ml/cm H <sub>2</sub> O              | 41 ± 11                    | 39 ± 10                                        | 42 ± 12                                   | .19            |
| <b>Driving Pressure,</b> cm<br>H <sub>2</sub> O | 11 ± 3                     | 11 ± 3                                         | 11 ± 3                                    | .31            |
| <b>Arterial blood Gas:</b>                      |                            |                                                |                                           |                |
| <b>pH</b>                                       | 7.36 ± 0.07                | 7.36 ± 0.07                                    | 7.37 ± 0.07                               | .41            |
| <b>PaCO<sub>2</sub>,</b> mm Hg                  | 47 ± 9                     | 49 ± 10                                        | 46 ± 8                                    | .064           |
| <b>Ventilatory Ratio</b>                        | 1.6 ± 0.5                  | 1.7 ± 0.5                                      | 1.6 ± 0.4                                 | .56            |
| <b>PaO<sub>2</sub>,</b> mm Hg                   | 77 ± 16                    | 77 ± 16                                        | 77 ± 16                                   | .77            |
| <b>FiO<sub>2</sub>,</b> %                       | 77 ± 2                     | 75 ± 2                                         | 79 ± 2                                    | .19            |
| <b>PaO<sub>2</sub>/FiO<sub>2</sub></b>          | 103 [82, 123]              | 105 [82, 133]                                  | 101 [76, 120]                             | .42            |

The median PaO<sub>2</sub>/FiO<sub>2</sub> ratio increase observed during prone ventilation was used as cut-off, defining Oxygen Responders subjects with a PaO<sub>2</sub>/FiO<sub>2</sub> ratio above the median value and Oxygen Non Responders when below. *Acronyms: ARDS: acute respiratory distress syndrome; Crs: compliance of the respiratory system; FiO<sub>2</sub> inspiratory fraction of oxygen; PaCO<sub>2</sub> arterial*

*partial pressure of carbon dioxide; PaO<sub>2</sub> arterial partial pressure of oxygen; PBW: predicted body weight, PEEP: positive end-expiratory pressure; RR: respiratory rate.*

**Table S3. Clinical outcomes of the population divided by oxygen response to pronation**

| <b>Variables</b>                  | <b>Total<br/>(N = 125)</b> | <b>Oxygen Non-<br/>responders<br/>(N = 62)</b> | <b>Oxygen<br/>Responders<br/>(N = 63)</b> | <b>p-value</b> |
|-----------------------------------|----------------------------|------------------------------------------------|-------------------------------------------|----------------|
| <b>Number of Pronation, n</b>     | 4 [2, 6]                   | 4 [2, 6]                                       | 4 [2, 7]                                  | .56            |
| <b>Total Pronation Time, hour</b> | 80 [46, 146]               | 76 [41, 148]                                   | 90 [48, 146]                              | .67            |
| <b>iNO, n (%)</b>                 | 32 (26)                    | 22 (35)                                        | 10 (16)                                   | .01            |
| <b>Days of Ventilation</b>        | 30 [17, 41.5]              | 33 [19, 43]                                    | 28 [16, 36]                               | .19            |
| <b>Tracheostomy, n (%)</b>        | 76 (61)                    | 36 (58)                                        | 40 (63)                                   | .53            |
| <b>Hospital LOS, days</b>         | 45 [26, 65]                | 47 [25, 63]                                    | 43 [26, 65]                               | .91            |
| <b>ICU LOS days</b>               | 33 [19, 45]                | 35 [19, 47]                                    | 32 [19, 42]                               | .54            |
| <b>ICU Outcome</b>                |                            |                                                |                                           | .54            |
| Deceased n (%)                    | 51 (41)                    | 27 (44)                                        | 24 (38)                                   |                |
| Discharged n (%)                  | 74 (59)                    | 35 (56)                                        | 39 (62)                                   |                |

The median PaO<sub>2</sub>/FiO<sub>2</sub> ratio increase observed during prone ventilation was used as cut-off, defining Oxygen Responders subjects with a PaO<sub>2</sub>/FiO<sub>2</sub> ratio above the median value and Oxygen Non Responders when below. *Acronyms: ICU: intensive care unit; iNO: inhaled nitric oxide; LOS: length of stay.*

**Table S4. Baseline quantitative CT parameters of the population divided for the oxygen response to pronation.**

| <b>Variables</b>           | <b>All patients<br/>(N = 125)</b> | <b>Oxygen Non-<br/>responders<br/>(N = 62)</b> | <b>Oxygen<br/>Responders<br/>(N = 63)</b> | <b>p-value</b> |
|----------------------------|-----------------------------------|------------------------------------------------|-------------------------------------------|----------------|
| <b>Bilateral Lung</b>      |                                   |                                                |                                           |                |
| <b>Volume, ml</b>          | 3526 ±1009                        | 3534 ± 997                                     | 3518 ± 1028                               | .93            |
| <b>Density, HU</b>         | -545 ±106                         | -534 ± 102                                     | -557 ± 110                                | .22            |
| <b>Tissue mass, g</b>      | 1541 ±390                         | 1593 ± 409                                     | 1490 ± 366                                | .14            |
| <b>Hyper inflated lung</b> |                                   |                                                |                                           |                |
| <b>Volume, ml</b>          | 160 ±157                          | 163 ± 168                                      | 157 ± 147                                 | .84            |
| <b>Density, HU</b>         | -968 ±2                           | -968 ± 3                                       | -968 ± 2                                  | .46            |
| <b>Tissue mass, g</b>      | 5 ±5                              | 5 ± 5                                          | 5 ± 4                                     | .96            |
| <b>Well aerated lung</b>   |                                   |                                                |                                           |                |
| <b>Volume, ml</b>          | 2092 ±895                         | 2037 ± 843                                     | 2145 ± 947                                | .50            |
| <b>Density, HU</b>         | -740 ±31                          | -740 ± 31                                      | -740 ± 32                                 | .90            |
| <b>Tissue mass, g</b>      | 530 ±208                          | 518 ± 201                                      | 542 ± 216                                 | .52            |
| <b>Poorly aerated lung</b> |                                   |                                                |                                           |                |
| <b>Volume, ml</b>          | 891 ±324                          | 902 ± 351                                      | 879 ± 297                                 | .69            |
| <b>Density, HU</b>         | -343 ±20                          | -342 ± 18                                      | -344 ± 22                                 | .72            |
| <b>Tissue mass, g</b>      | 584 ±210                          | 593 ± 227                                      | 576 ± 193                                 | .67            |
| <b>Non aerated lung</b>    |                                   |                                                |                                           |                |
| <b>Volume, ml</b>          | 319 ±192                          | 353 ± 196                                      | 285 ± 184                                 | .050           |
| <b>Density, HU</b>         | -51 ±8                            | -49 ± 9                                        | -53 ± 5                                   | .004           |
| <b>Tissue mass, g</b>      | 303 ±185                          | 337 ± 190                                      | 271 ± 176                                 | .047           |

The median PaO<sub>2</sub>/FiO<sub>2</sub> ratio increase observed during prone ventilation was used as cut-off, defining Oxygen Responders subjects with a PaO<sub>2</sub>/FiO<sub>2</sub> ratio above the median value and Oxygen Non Responders when below. *Acronyms: CT: computed tomography.*

**Table S5. Population demographic characteristics at ICU admission divided by CO<sub>2</sub> response to pronation.**

| <b>Variables</b>                 | <b>Total<br/>(N = 125)</b> | <b>CO<sub>2</sub> Non-responders<br/>(N = 74)</b> | <b>CO<sub>2</sub> Responders<br/>(N = 51)</b> | <b>p-value</b> |
|----------------------------------|----------------------------|---------------------------------------------------|-----------------------------------------------|----------------|
| <b>Sex, Female n(%)</b>          | 30 (24)                    | 17 (23)                                           | 13 (25)                                       | .75            |
| <b>Age, years</b>                | 62 ± 11                    | 62 ± 11                                           | 62 ± 10                                       | .98            |
| <b>Weight, kg</b>                | 86 ± 19                    | 86 ± 21                                           | 87 ± 17                                       | .44            |
| <b>Height, cm</b>                | 171 ± 9                    | 171 ± 9                                           | 171 ± 9                                       | .68            |
| <b>BMI, kg/m<sup>2</sup></b>     | 30 ± 6                     | 30 ± 7                                            | 30 ± 6                                        | .57            |
| <b>Comorbidities:</b>            |                            |                                                   |                                               |                |
| <b>Hypertension, n(%)</b>        | 64 (51)                    | 36 (49)                                           | 28 (55)                                       | .49            |
| <b>Diabetes, n(%)</b>            | 22 (18)                    | 12 (16)                                           | 10 (20)                                       | .63            |
| <b>Active Smoke, n(%)</b>        | 5(4)                       | 1 (1)                                             | 4 (8)                                         | .07            |
| <b>Obesity, n(%)</b>             | 38 (30)                    | 21 (28)                                           | 17 (33)                                       | .55            |
| <b>Cancer, n(%)</b>              | 14 (11)                    | 10 (14)                                           | 4 (8)                                         | .32            |
| <b>CKD, n(%)</b>                 | 9 (7)                      | 6 (8)                                             | 3 (6)                                         | .64            |
| <b>COPD, n(%)</b>                | 13 (10)                    | 6 (8)                                             | 7 (14)                                        | .31            |
| <b>Atrial Fibrillation, n(%)</b> | 8 (6)                      | 4 (5)                                             | 4 (8)                                         | .58            |
| <b>CAD, n(%)</b>                 | 15 (12)                    | 4 (5)                                             | 11 (22)                                       | .007           |
| <b>Liver disease, n(%)</b>       | 10 (8)                     | 6 (8)                                             | 4 (8)                                         | 1.00           |
| <b>SOFA</b>                      | 5 [4, 6]                   | 5 [3, 6]                                          | 5 [4, 6]                                      | .37            |
| <b>SAPS II</b>                   | 38 [33, 43]                | 40 [33, 44]                                       | 37 [33, 41]                                   | .25            |

*Acronyms: BMI body mass index; CAD coronary arterial disease; CKD: chronic kidney disease; COPD: chronic obstructive pulmonary disease; CT computed tomography; ICU: intensive care unit; SAPS: Simplified Acute Physiology Score; SOFA: Sequential Organ Failure Assessment.*



**Table S6. Ventilatory parameters of the population divided by carbon dioxide response to pronation in supine position before the first pronation cycle.**

| <b>Variables</b>                               | <b>Total<br/>(N = 125)</b> | <b>CO<sub>2</sub> Non-responders<br/>(N = 74)</b> | <b>CO<sub>2</sub> Responders<br/>(N = 51)</b> | <b>p-value</b> |
|------------------------------------------------|----------------------------|---------------------------------------------------|-----------------------------------------------|----------------|
| <b>ARDS Severity</b>                           |                            |                                                   |                                               | .40            |
| Mild n(%)                                      | 1 (0.8)                    | 0 (0)                                             | 1 (2)                                         |                |
| Moderate n(%)                                  | 65 (52.0)                  | 37 (50)                                           | 28 (55)                                       |                |
| Severe n(%)                                    | 59 (47.2)                  | 37 (50)                                           | 22 (43)                                       |                |
| <b>Ventilator setting:</b>                     |                            |                                                   |                                               |                |
| <b>Tidal Volume/PBW,</b><br>ml/kg              | 6.7 ± 0.9                  | 6.6 ± 0.8                                         | 6.9 ± 1.0                                     | .019           |
| <b>RR, breath/minute</b>                       | 19 ± 3                     | 18 ± 3                                            | 21 ± 4                                        | <0.001         |
| <b>PEEP, cm H<sub>2</sub>O</b>                 | 12 ± 3                     | 12 ± 2                                            | 12 ± 3                                        | .80            |
| <b>Plateau Pressure, cm<br/>H<sub>2</sub>O</b> | 24 ± 3                     | 24 ± 3                                            | 24 ± 3                                        | .96            |
| <b>Crs, ml/cm H<sub>2</sub>O</b>               | 41 ± 11                    | 39 ± 10                                           | 43 ± 13                                       | .09            |
| <b>Driving Pressure, cm<br/>H<sub>2</sub>O</b> | 11 ± 3                     | 11 ± 3                                            | 11 ± 3                                        | .78            |
| <b>Arterial blood Gas:</b>                     |                            |                                                   |                                               |                |
| <b>pH</b>                                      | 7.36 ± 0.07                | 7.37 ± 0.07                                       | 7.35 ± 0.07                                   | .026           |
| <b>PaCO<sub>2</sub>, mm Hg</b>                 | 47 ± 9                     | 46 ± 9                                            | 49 ± 9                                        | .09            |
| <b>Ventilatory Ratio</b>                       | 1.6 ± 0.5                  | 1.5 ± 0.4                                         | 1.9 ± 0.5                                     | <0.001         |
| <b>PaO<sub>2</sub>, mm Hg</b>                  | 77 ± 16                    | 77 ± 17                                           | 77 ± 14                                       | .96            |
| <b>FiO<sub>2</sub>, %</b>                      | 0.8 ± 0.2                  | 0.8 ± 0.2                                         | 0.8 ± 0.2                                     | .47            |
| <b>PaO<sub>2</sub>/FiO<sub>2</sub></b>         | 103 [82, 123]              | 100 [82, 120]                                     | 107 [81, 130]                                 | .44            |

*Acronyms: ARDS: acute respiratory distress syndrome; Crs: compliance of the respiratory system; FiO<sub>2</sub> inspiratory fraction of oxygen; PaCO<sub>2</sub> arterial partial pressure of carbon dioxide; PaO<sub>2</sub> arterial partial pressure of oxygen; PBW: predicted body weight, PEEP: positive end-expiratory pressure; RR: respiratory rate.*

**Table S7. Clinical outcomes of the population divided by carbon dioxide response to pronation**

| <b>Variables</b>                      | <b>Total<br/>(N = 125)</b> | <b>CO<sub>2</sub> Non-responders<br/>(N = 74)</b> | <b>CO<sub>2</sub> Responders<br/>(N = 51)</b> | <b>p-value</b> |
|---------------------------------------|----------------------------|---------------------------------------------------|-----------------------------------------------|----------------|
| <b>Number of Pronation, n</b>         | 4 [2, 6]                   | 4 [2, 6]                                          | 3 [2, 6]                                      | .82            |
| <b>Total Pronation Time,<br/>hour</b> | 80 [46, 146]               | 83 [46, 146]                                      | 76 [41, 150]                                  | .94            |
| <b>iNO, n(%)</b>                      | 32 (26)                    | 23 (31)                                           | 9 (18)                                        | .07            |
| <b>Days of Ventilation</b>            | 30 [17, 41.5]              | 29 [16, 39]                                       | 33 [19, 42]                                   | .40            |
| <b>Tracheostomy, n(%)</b>             | 76 (61)                    | 41 (55)                                           | 35 (69)                                       | .10            |
| <b>Hospital LOS, days</b>             | 45 [26, 65]                | 40 [22, 63]                                       | 49 [33, 65]                                   | .14            |
| <b>ICU LOS days</b>                   | 33 [19, 45]                | 33 [16, 43]                                       | 36 [19, 46]                                   | .43            |
| <b>ICU Outcome</b>                    |                            |                                                   |                                               | .46            |
| Deceased n(%)                         | 50 (40)                    | 32 (43)                                           | 18 (35)                                       |                |
| Discharged n(%)                       | 75 (60)                    | 42 (57)                                           | 33 (64)                                       |                |

*Acronyms: ICU: intensive care unit; iNO: inhaled nitric oxide; LOS: length of stay.*

**Table S8. Quantitative CT characteristics dividing the population based on the ARDS severity**

| <b>Variables</b>           | <b>Total<br/>(N = 124)</b> | <b>Moderate<br/>(N = 65)</b> | <b>Severe<br/>(N = 59)</b> | <b>p-value</b> |
|----------------------------|----------------------------|------------------------------|----------------------------|----------------|
| <b>Bilateral Lung</b>      |                            |                              |                            |                |
| <b>Volume, ml</b>          | 3514 ±1005                 | 3470 ±952                    | 3563 ±1066                 | .61            |
| <b>Density, HU</b>         | -544 ±106                  | -551 ±104                    | -537 ±108                  | .46            |
| <b>Tissue mass, g</b>      | 1542 ±391                  | 1502 ±380                    | 1586 ±402                  | .23            |
| <b>Hyper inflated lung</b> |                            |                              |                            |                |
| <b>Volume, ml</b>          | 159 ±157                   | 171 ±178                     | 145 ±130                   | .36            |
| <b>Density, HU</b>         | -968 ±2                    | -968 ±2                      | -968 ±3                    | .46            |
| <b>Tissue mass, g</b>      | 5 ±5                       | 5 ±5                         | 4 ±4                       | .38            |
| <b>Well aerated lung</b>   |                            |                              |                            |                |
| <b>Volume, ml</b>          | 2079 ±887                  | 2054 ±861                    | 2106 ±921                  | .75            |
| <b>Density, HU</b>         | -740 ±31                   | -741 ±32                     | -738 ±30                   | .64            |
| <b>Tissue mass, g</b>      | 528 ±208                   | 518 ±192                     | 539 ±225                   | .57            |
| <b>Poorly aerated lung</b> |                            |                              |                            |                |
| <b>Volume, ml</b>          | 892 ±324                   | 878 ±310                     | 907 ±342                   | .62            |
| <b>Density, HU</b>         | -343 ±20                   | -344 ±20                     | -342 ±20                   | .58            |
| <b>Tissue mass, g</b>      | 585 ±211                   | 576 ±204                     | 596 ±219                   | .61            |
| <b>Non-aerated lung</b>    |                            |                              |                            |                |
| <b>Volume, ml</b>          | 320 ±193                   | 305 ±191                     | 337 ±195                   | .36            |
| <b>Density, HU</b>         | -51 ±8                     | -51 ±9                       | -50 ±6                     | .66            |
| <b>Tissue mass, g</b>      | 305 ±185                   | 291 ±184                     | 321 ±186                   | .37            |

*Acronyms: CT: computed tomography.*

**Supplementary Figures**

**Figure S1. Antero-posterior regional lung tissue distribution in intubated patients divided by the O<sub>2</sub> response to pronation.**

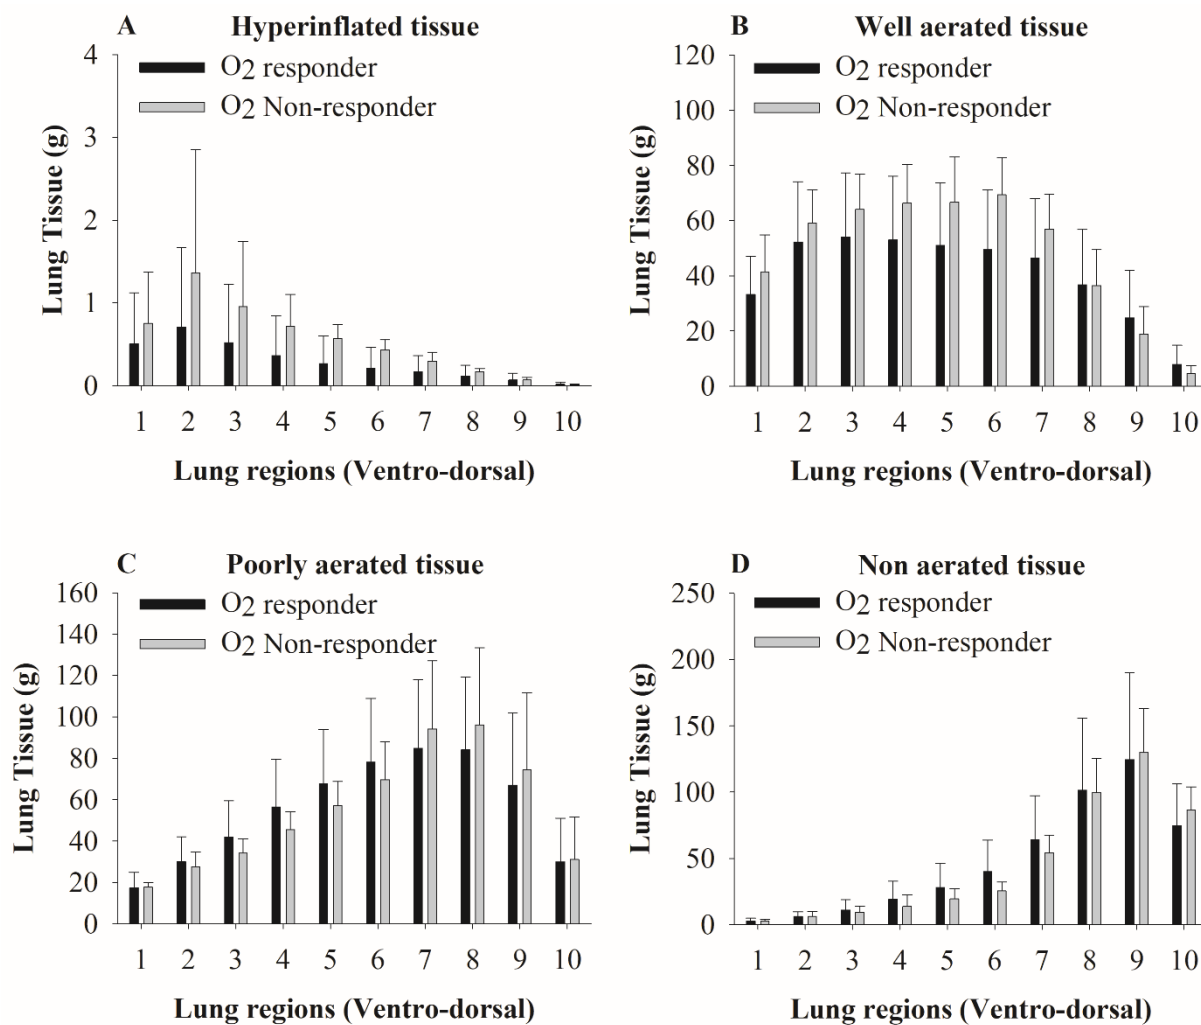

**Figure S2. Antero-posterior regional lung tissue distribution in patients divided by the CO<sub>2</sub> response to pronation.**

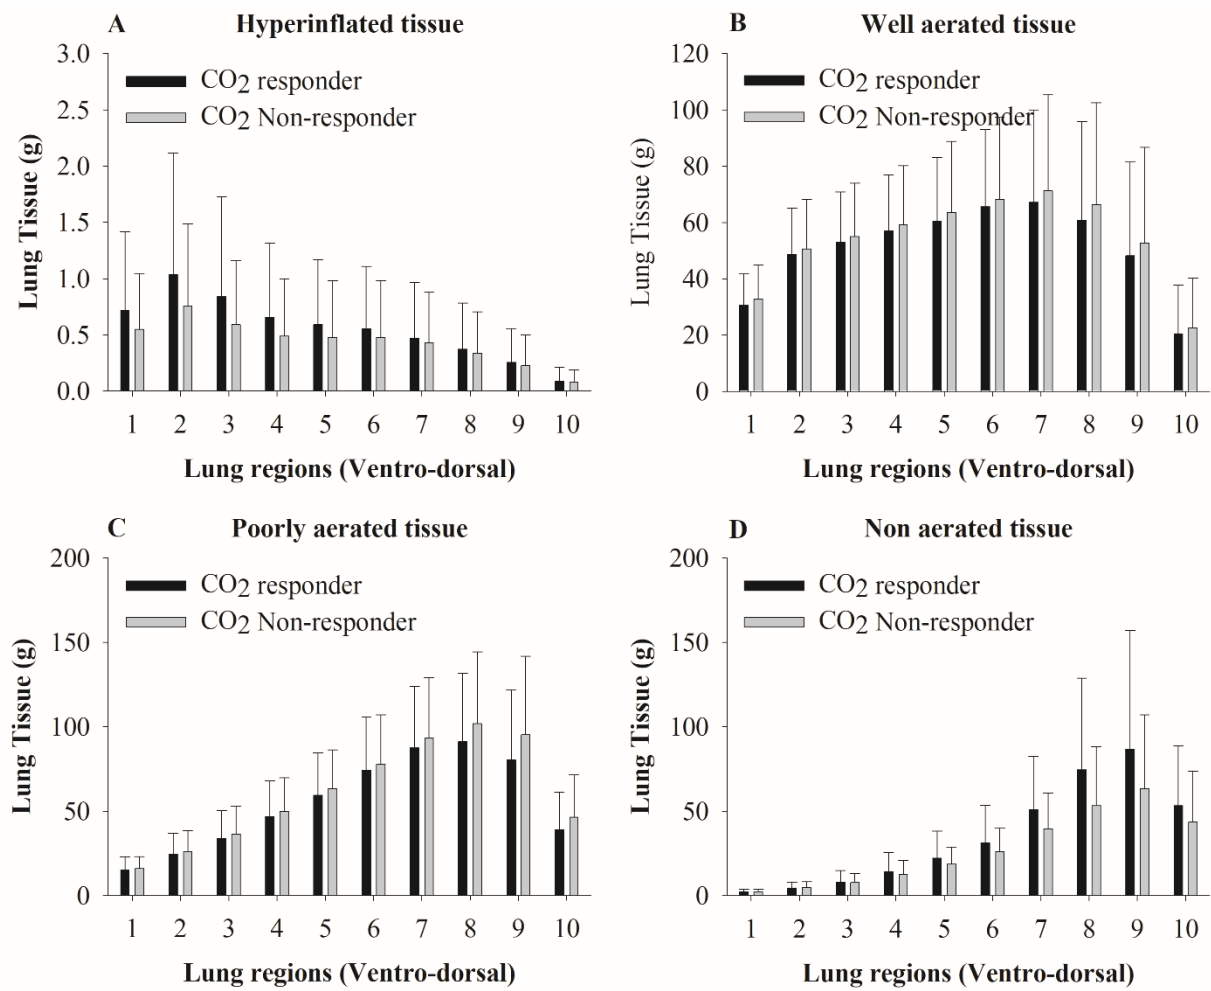

**Figure S3. Association between the length of disease before pronation and response in PaO<sub>2</sub>/FiO<sub>2</sub> ratio to pronation**

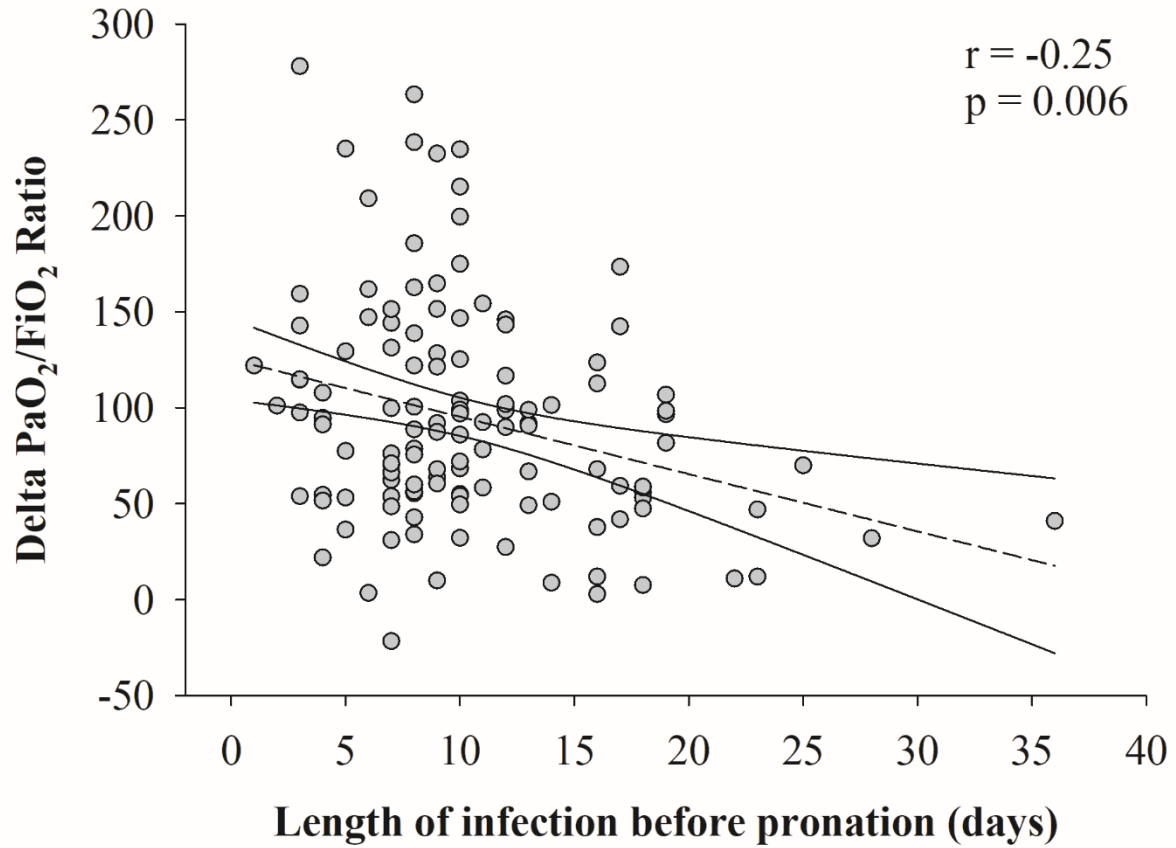

**Figure S4. Association between the length of non-invasive ventilation before ICU pronation and response in PaO<sub>2</sub>/FiO<sub>2</sub> ratio to pronation**

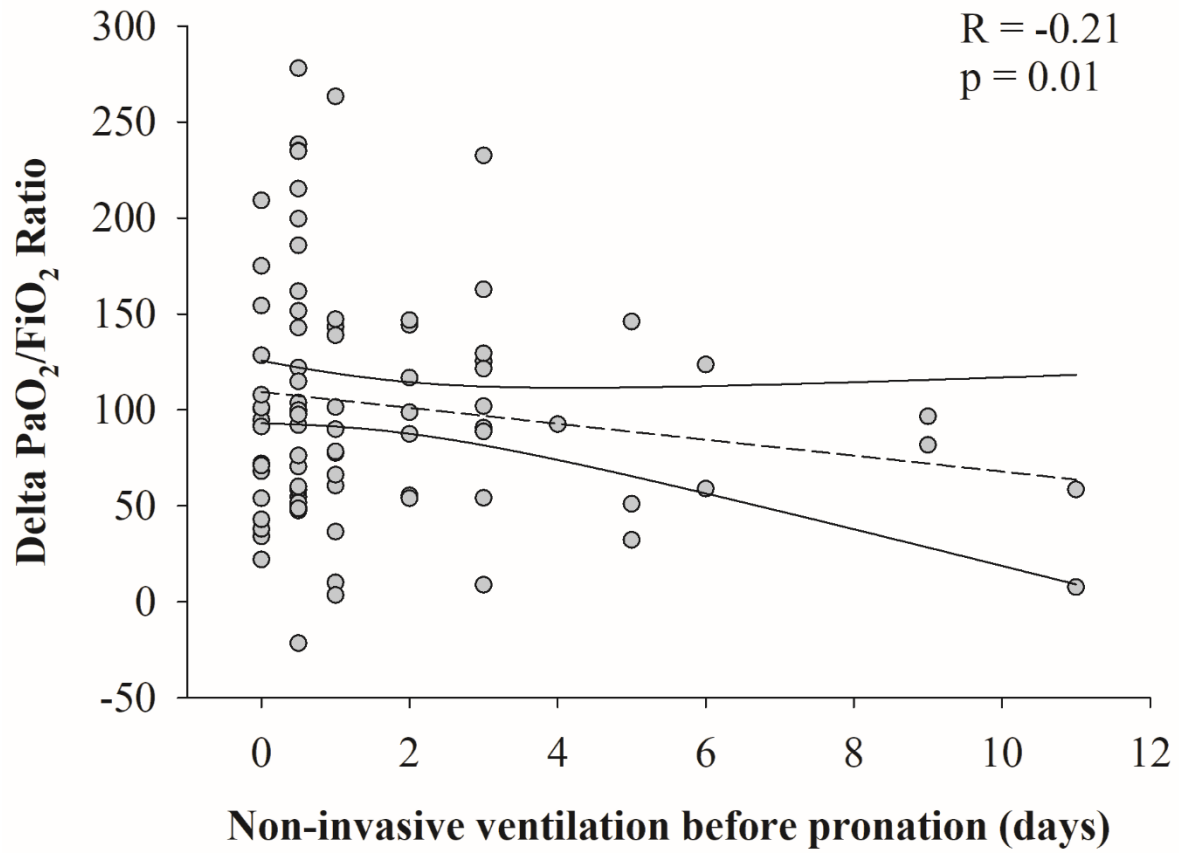

Supplement: Supplement_Resp_Care.pdf [file Supplement_Resp_Care.pdf]
